# Supplementary material
Source: PubMed Central journal article supplement (PMC8601232)
Supplement: jcm.00649-21-s0002.pdf [file jcm.00649-21-s0002.pdf]

## Supplemental Methods

### V3 primer set modifications and PCR

Modified V3 pool1-M was generated by mixing 5  $\mu$ l of each primer nCoV-2019\_5\_RIGHT, nCoV-2019\_5\_LEFT, nCoV-2019\_9\_RIGHT, nCoV-2019\_9\_LEFT, nCoV-2019\_17\_RIGHT, nCoV-2019\_17\_LEFT, nCoV-2019\_23\_RIGHT, nCoV-2019\_23\_LEFT, nCoV-2019\_45\_RIGHT, nCoV-2019\_45\_LEFT, nCoV-2019\_55\_RIGHT, nCoV-2019\_55\_LEFT, nCoV-2019\_67\_RIGHT, nCoV-2019\_67\_LEFT, nCoV-2019\_71\_RIGHT, nCoV-2019\_71\_LEFT, nCoV-2019\_73\_RIGHT, nCoV-2019\_73\_LEFT, nCoV-2019\_91\_RIGHT, nCoV-2019\_91\_LEFT, nCoV-2019\_97\_RIGHT and nCoV-2019\_97\_LEFT.

Modified V3 pool2-M was generated by mixing 5  $\mu$ l of each primer nCoV-2019\_8\_RIGHT, nCoV-2019\_8\_LEFT, nCoV-2019\_10\_RIGHT, nCoV-2019\_10\_LEFT, nCoV-2019\_12\_RIGHT, nCoV-2019\_12\_LEFT, nCoV-2019\_20\_RIGHT, nCoV-2019\_20\_LEFT, nCoV-2019\_28\_RIGHT, nCoV-2019\_28\_LEFT, nCoV-2019\_50\_RIGHT, nCoV-2019\_50\_LEFT, nCoV-2019\_54\_RIGHT, nCoV-2019\_54\_LEFT, nCoV-2019\_66\_RIGHT, nCoV-2019\_66\_LEFT, nCoV-2019\_70\_RIGHT, nCoV-2019\_70\_LEFT, nCoV-2019\_74\_RIGHT, nCoV-2019\_74\_LEFT, nCoV-2019\_92\_RIGHT and nCoV-2019\_92\_LEFT. In addition, pool 2-M also contained 7  $\mu$ l of primers nCoV-2019\_64\_RIGHT, nCoV-2019\_64\_LEFT and 6  $\mu$ l of primers nCoV-2019\_98\_RIGHT, nCoV-2019\_98\_LEFT.

Pool PCR #1 was setup using 2.5  $\mu$ l cDNA, 3.4  $\mu$ l V3 pool1 primers (10  $\mu$ M), 0.8  $\mu$ l V3 pool1-M primers (10  $\mu$ M), 12.45  $\mu$ l Q5 High-Fidelity 2X Master Mix (NEB, Ipswich, MA, USA) and 5.85  $\mu$ l dH<sub>2</sub>O. Pool PCR #2 was setup using 2.5  $\mu$ l cDNA, 3.4  $\mu$ l V3 pool2 primers (10  $\mu$ M), 1  $\mu$ l V3 pool2-M primers (10  $\mu$ M), 12.5  $\mu$ l Q5 High-Fidelity 2X Master Mix and 5.6  $\mu$ l dH<sub>2</sub>O was added.
