# Supplementary material
Source: PubMed Central journal article supplement (PMC8601232)

Figure S1: Depth of coverage across the genome for two samples sequenced with 16 or 32 samples per chip. The blue plot shows the depth when the sample was sequenced with 16 samples per chip while the orange plot shows the depth when sequenced with 32 samples on a chip.

S1a) IDR2000031488 (Ct = 22.41) represents coverage of a sample with a moderate viral load.

S1b) IDR2000022503 (Ct = 27.53) with a low viral load.

S1a

**IDR2000031488**

**Ct = 22.41**

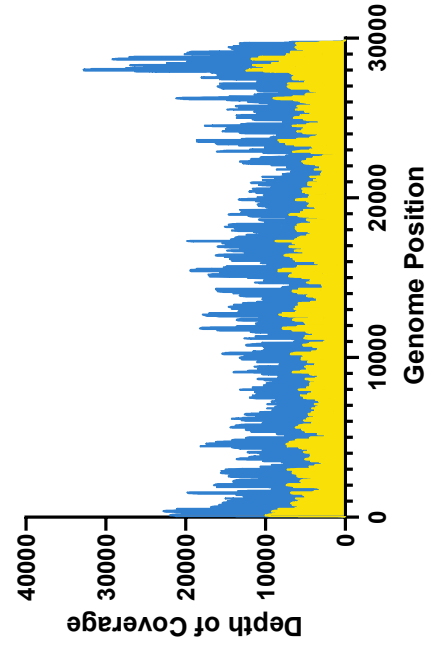

S1b

**IDR2000022503**

**Ct = 27.53**

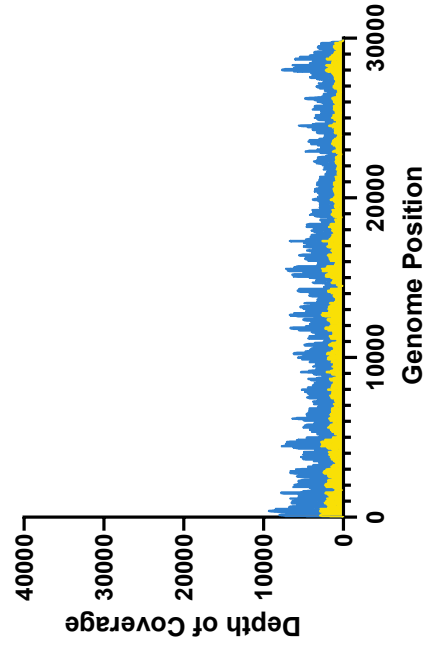

Supplement: jcm.00649-21-s0003.pdf [file jcm.00649-21-s0003.pdf]
